# Supplementary material for: The diversification of the basic leucine zipper family in eukaryotes correlates with the evolution of multicellularity
Source: PubMed Central journal article supplement (PMC4736632; doi:10.1186/s12862-016-0598-z), 2016-02-01

Opisthokonts  
 Holozoans  
 Metazoans  
 Eumetazoans  
 Bilaterians

*Hs* *Dm* *Hm* *Aq* *Mb* *Co* *Sc*

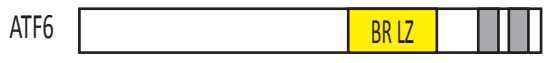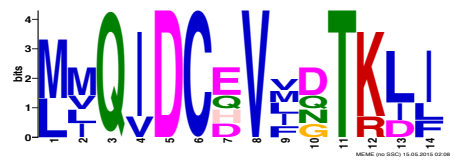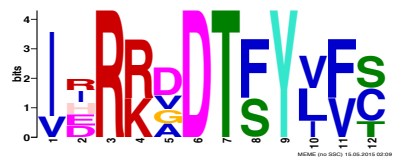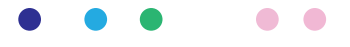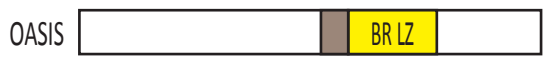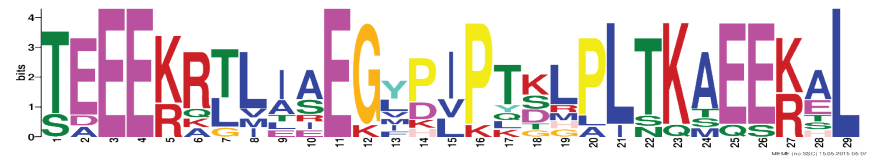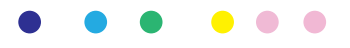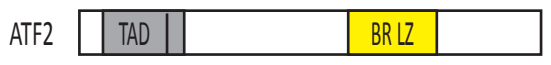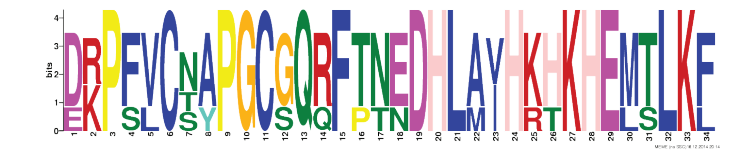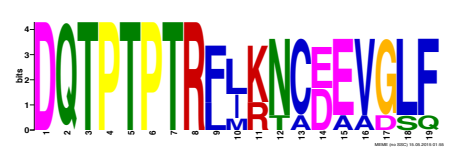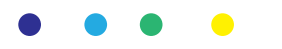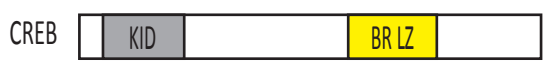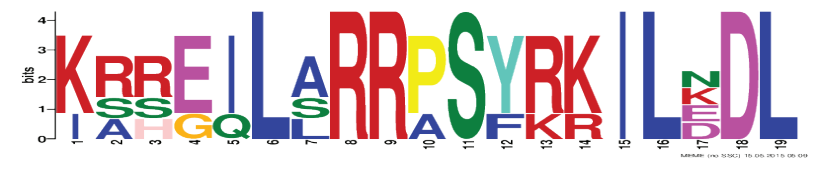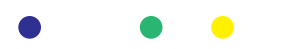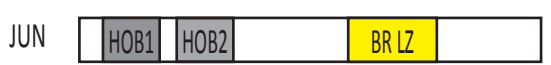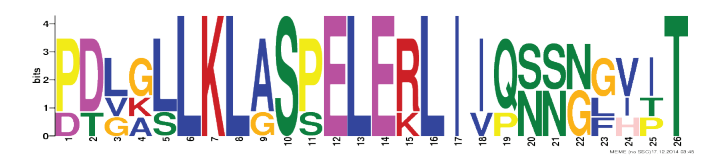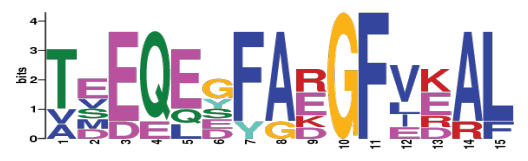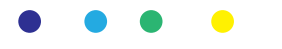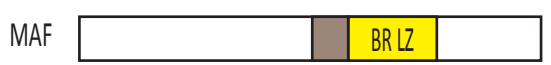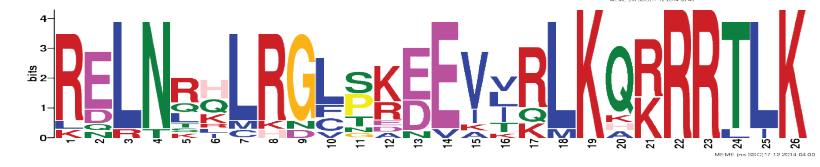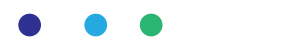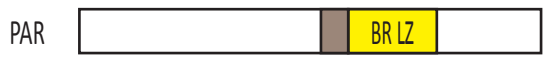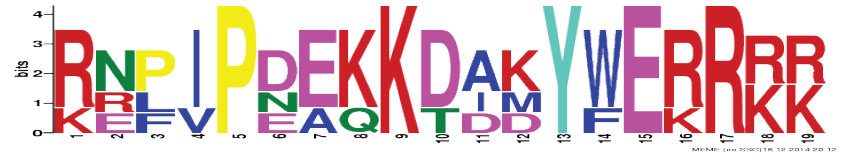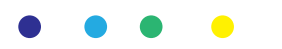

Supplement: 12862_2016_598_MOESM5_ESM.pdf [file 12862_2016_598_MOESM5_ESM.pdf]
