# Supplementary material for: The diversification of the basic leucine zipper family in eukaryotes correlates with the evolution of multicellularity
Source: PubMed Central journal article supplement (PMC4736632; doi:10.1186/s12862-016-0598-z), 2016-02-01
Supplement: 12862_2016_598_MOESM2_ESM.pdf [file 12862_2016_598_MOESM2_ESM.pdf]

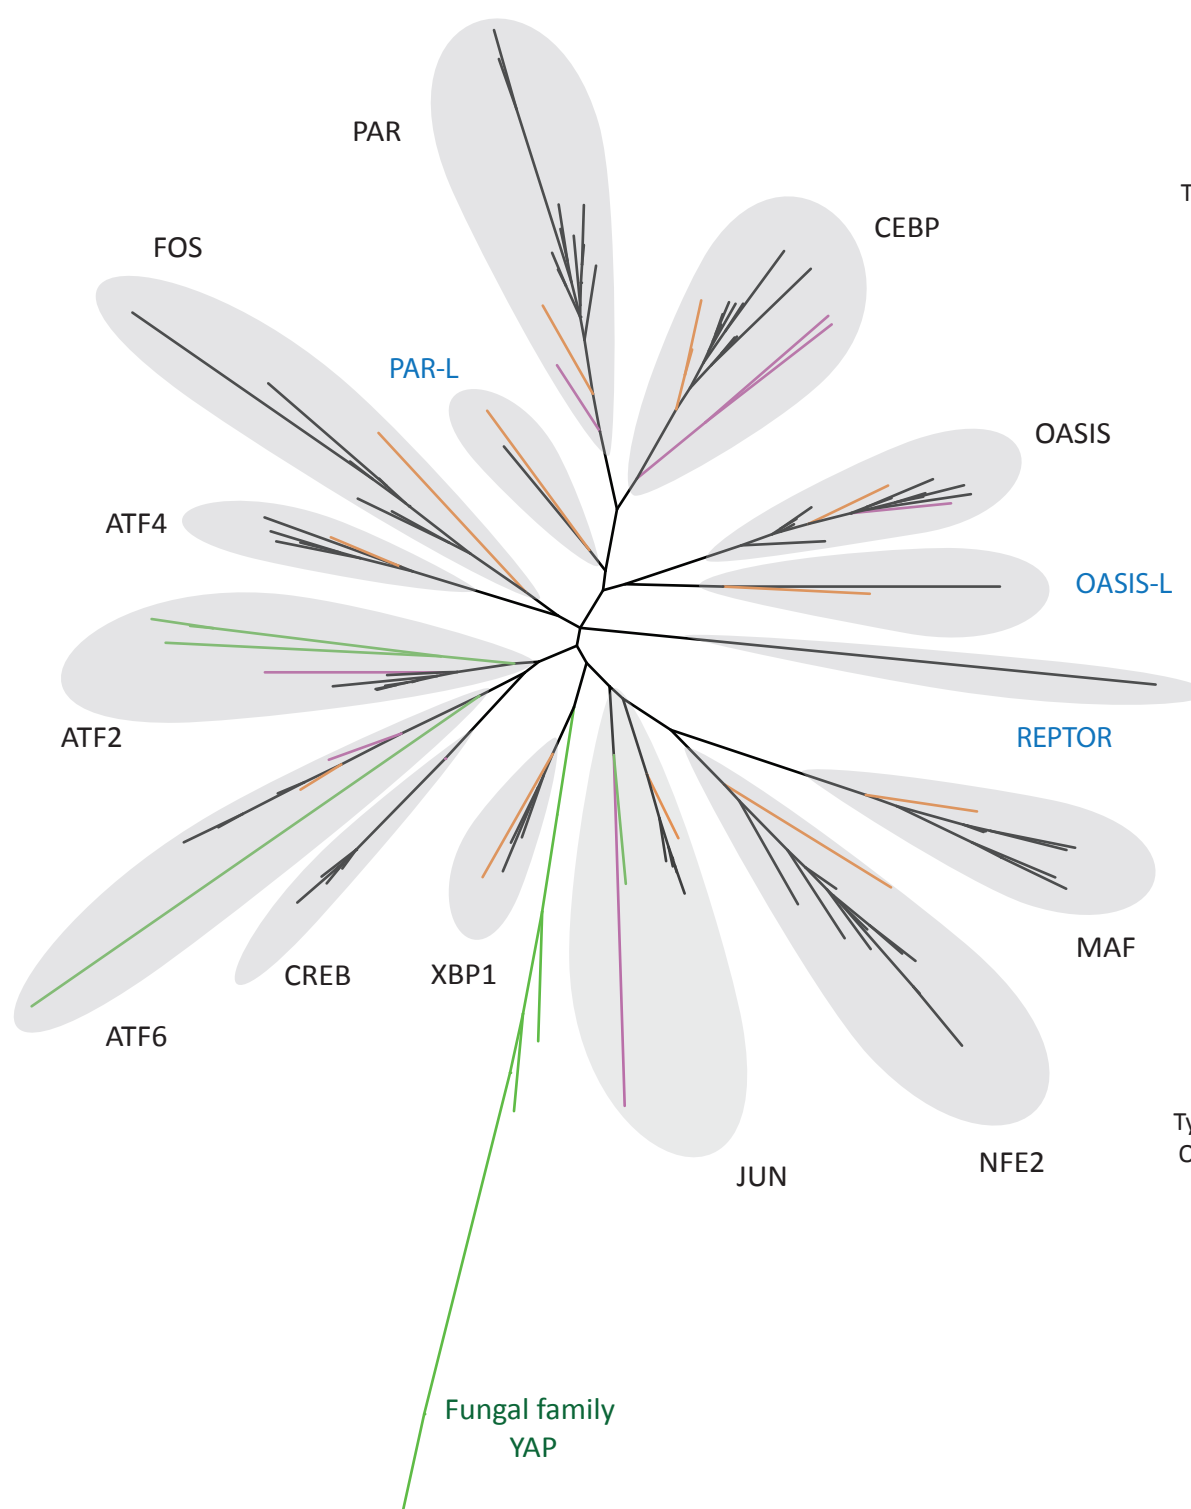

### PAR-L

Typical PAR

|            |                                                                          |
|------------|--------------------------------------------------------------------------|
| Hsap_HLF   | KDDK YWARRR KNNM AAKRSR DARR LKENQ IAI RASF ILEK ENSAL RQEVAD TRKELGKQ   |
| Dapu102458 | KDDK YWARRR KNNM AAKRSR DARR VKENQ IAMRAN FLENKNAD LQAEV EKWKKLYIATL     |
| Nemv8845   | KDQK YWERRR LKNNV AAKRSR DLKROK EMVAKRAQN DEI ENKELRNEV                  |
| Amq2715    | KDDK YWERRR KNNM AAKRSR ETKKQKV DEE LKAKDAI OBNHKLKQETEVTKAEINSTR        |
| Brf7881    | PAE PPI DRRR KNNI AAQVSR RRRK REEAGMEQKAVEL EEAANAK LR EKVAQL EQATKEMK   |
| Spur3751   | PEEL YRRR R KNNK AQORAR QSRKK RDNDA S TAKI ILEKENA ELRAKIEETFEIABI SR    |
| Dmeg0060   | RS PDKQERR NKN TIACRMS RRRKKK FDDLQ IPEQQYK ECDSEHLK IAEQSLR ARVYLNHLK   |
| Dmeg3114   | EER KAYQDR LKNNV ASRVSR RRTKVR EEEEEKRAEDT I LAENLR LRARADEV ASRERKFK    |
| Tcas6744   | DAS K YREI R LKNNV ASRKS R LKRK VMEMS IQREAEET IYEK NVK LKAQVEEYERMVNNFR |
| Dapu304074 | SSNNSDIRV RNNV ASRKS RQNRN K LQTOAQLVDV IEEEGRR LSN TTKETESLKAETM        |
| Lotg3964   | RVDK YKVR R KNNI ASKRS RIRK N KFS EMEKAKQ FEVENAMRR DRIIVLEALAKEMK       |
| Ctel168114 | KDE K YVVR R KNNI ASQRS RAKRK OKNNE I SIOAAN IEMRNA ELRKKVEEM EKMAKELK   |
| Hmag2901   | LSD K IYERR KNNI ASKFR RAKRK RHHHE YIQATE ILEKSN AE LKIKIDV MOKQVNHDR    |
| Nemv3028   | DSDK SEER R RNNQ ASKKFR QARK GKQQA IFAKES I IERENYS LKVOVEQ IIRELNQLK    |
| Adi07094   | CSD IALER R RNNQ ASKKFR LRK RHHHT IFA RACK I GQENQLRN HIDE MTR E VVFLK   |
| Amq3394    | KLAK K AER K KNNV ASKVS RAKRK OKMKS I FEREK E IES ENAR LKLOVEEMTKAEERLK  |

### REPTOR

|            |                                                                                                                   |
|------------|-------------------------------------------------------------------------------------------------------------------|
| Brf3886    | LSV R P KSRKEKNK LASRA CRLK KKAQHEANK I K LQGL E S EY GSGT I                                                      |
| Dmeg0092   | FNV R P KSRKEKNK LASRA CRLK KKAQHEANK I K L FGL E T EHKR I LMNG I A E L K Q A L V V                               |
| Tcas4880   | FNV R P RSRKEKNK LASRA CRLK KKAQHEANK I K L N GLE N EHRN I L HG I S Q C R D I V M A                               |
| Dapu191081 | MAV R P KSRKEKNK LASRA CRLK KKAQHEANK V K L Y G L E Q EHRK I M A A I S O T K L M I T A                            |
| Nemv06719  | LNA R N KSRKEKNK LASRA CRLK KKAQHEANK I K L H G L E T E Q O R I I H V I E K V R S E T I T H                       |
| Adi10920   | QNA R N KSRKEKNK LASRA CRLK KKAQHEANK V K L Q G L E M E Q O R I T D I I G K V K E I T H                           |
| Tadh1467   | P G F Q S Q I R R E K N K I A S R T C R L K K K Q A Y E S N K I K L H G L E K E H D N I S N I L R T L K S E L L N |

### OASIS-L

Typical OASIS

|            |                                                                                                                         |
|------------|-------------------------------------------------------------------------------------------------------------------------|
| Hsap_Oasis | KALKRVR R K I K N K I S A Q E S R R K K K E Y V E C L E K K V E T F T S E N N F I W K K V E T L E N A N R T L Q         |
| Dapu51722  | KS L K K I R R K I K N K I S A Q E S R R K K K E Y M D T L E R R A Q V L A D E N S D Y R Q R L L K L E T D N A A Q L    |
| Nemv6435   | RA L K K V R R K I K N K I S A Q E S R R K K K E Y M E T L E K R V E T C S S E N L E I R R K K L D S L E N T N R N I G  |
| Nemv9698   | R V L K K V R R K I K N K O S A Q E S R R K K K D Y V D G L E M R V K V C T E K N T S I Q K K V D N L E K Q N L T E M D |
| Amq9874    | R H L K R V R R K I K N K O S A A D S R R K K K E Y I D G L E K R V E K C T A D N I L Y K E K I N S I Q A E N K S I L T |
| Amq7120    | K A L K T V R R K I R N R W A A O B S R N K R K K Y M E T F E R L K S C S S D N K R I L K K V S S I E T E N K S I R O   |
| Brf6962    | A Q Q E S E E V R K R N A E A A R Q N R L R K K H Y I Q D L E G K V D K L E K E N T S I K K N S K M Q V I S S M E E     |
| Spur3748   | E D S A T T S R S Q K N A T A A R E N R L K K K N E F E B M K R N E A L L Q E N E C I R R K E N S D O L K T I T G I Q Q |
| Spur8784   | G A R K S V R G P N R N A V M A K L N R E R K K O L M G D L E E K V G L L D T E N D A L K K Q N V R L R K K V N V A R   |
| Dapu243046 | S E D P A F E K S R K N A I I A K R N R E K K A L M D E M E K Q C D K L T K D N T H E S D N G K L R H R V T T E E       |
| Dapu334105 | S E D P A F E K S R K N A I I A K R N R E K K A L M D D E M E K R C D K L V Y D N Q O L E S D N G K L R H R V T T E E   |
| Lotg6773   | I T G R Y D P S M S K N A T A A R E N R L K K K O Y L A H L E K T V K K L S V E N K S H K T A E L L K D G E I S K I K T |
| Ctel191299 | D V D G V L E R N R K N A I Q A R L N R Q R K K E Y I E S M E D S L Q S L R T K N E E S D N K R L R S E N T E T L E     |
| Ctel223135 | F C M N G G K S M S K N A I L A R E N R Q R R K M Y V S N L E T S V K K L T S E N R A D K D N L K E S G S V A S I Q K   |
| Nemv9355   | D R Y V S D E G I N R Q A T M A K I N R E K K K O Y V Q L E G S V E E Y K S K N A V I Q K D C E D M K G L V K D I Q M   |
| Nemv0227   | E L K D I E D K N K N A T A A R E N R A K K K Y M E D L E K T V Q D L K K E N Q E I Q T G H S K L Q K T V E A I N D     |
| Adi11034   | D D P A M I D R N R K N A T A A R E N R O K K K Y V E G L E N E V G K L K D E N K T K T R N E S M S N M I L E T S D     |
| Amq8175    | L N D A A V E R N R K N A T A A R A N R O K K K E Y V S K L E E Q V E S L S A E N K S I F E R C R G L E G H V S D I K Q |

Fungal family  
YAP
