# Supplementary material for: The diversification of the basic leucine zipper family in eukaryotes correlates with the evolution of multicellularity
Source: PubMed Central journal article supplement (PMC4736632; doi:10.1186/s12862-016-0598-z), 2016-02-01

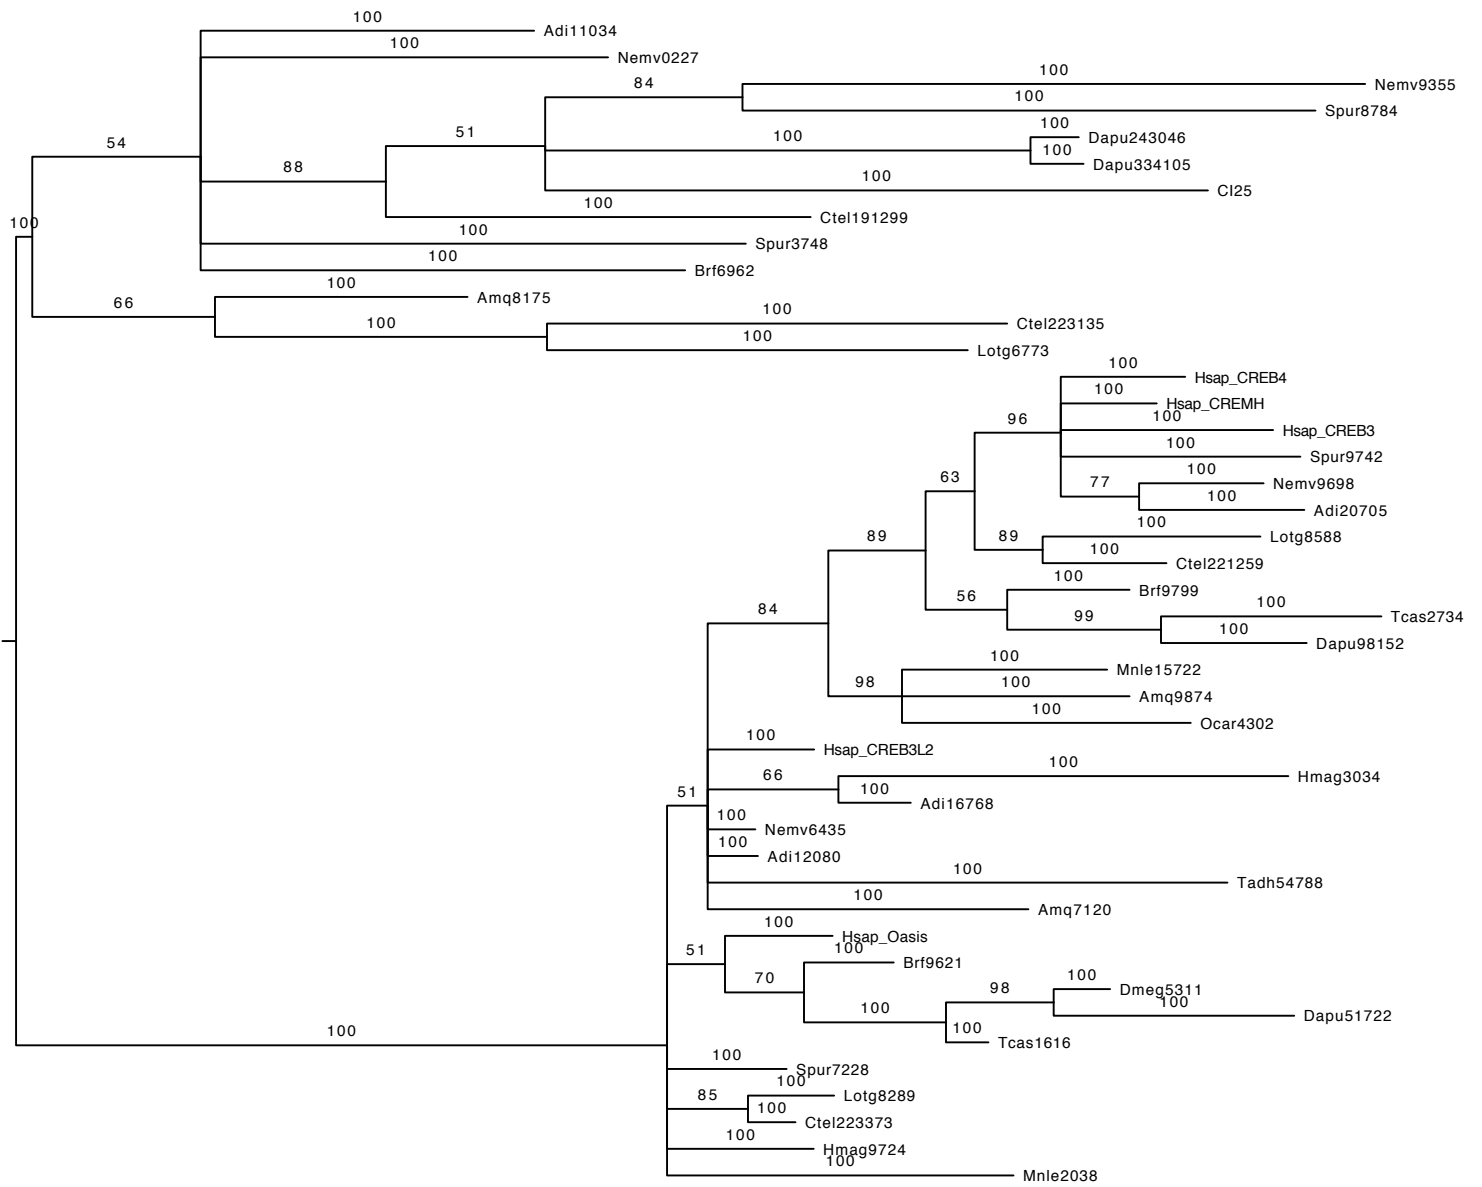

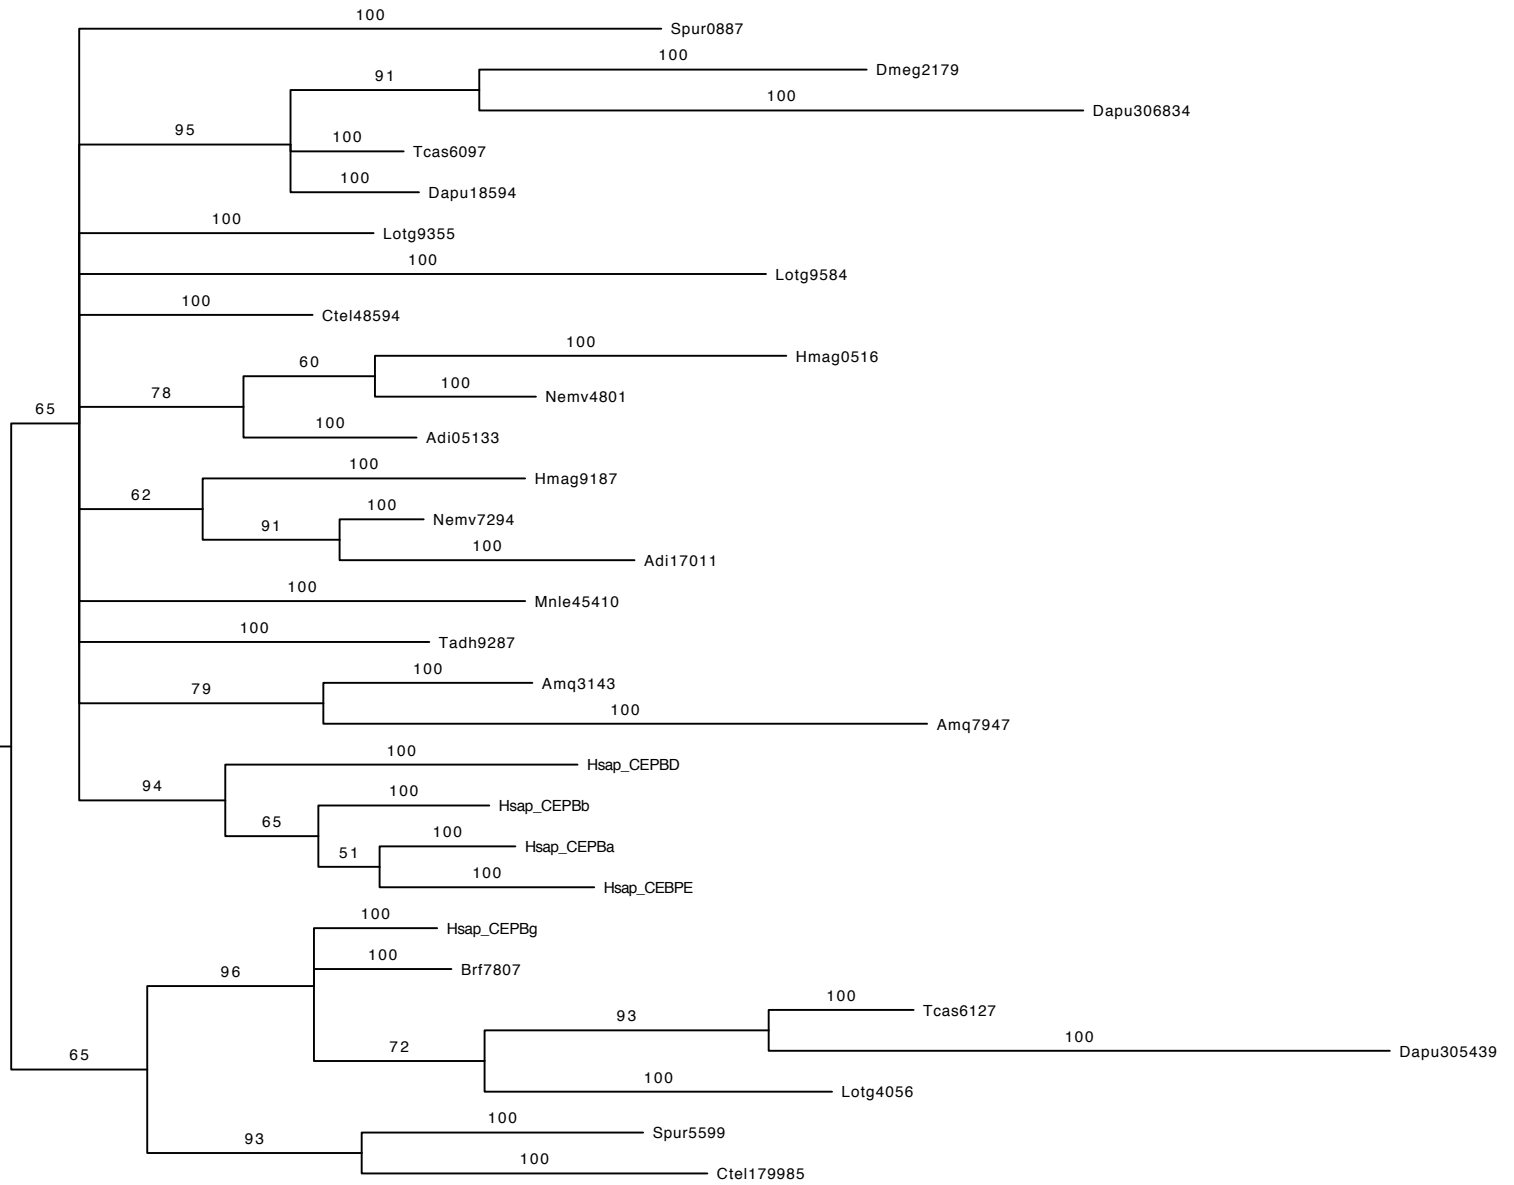

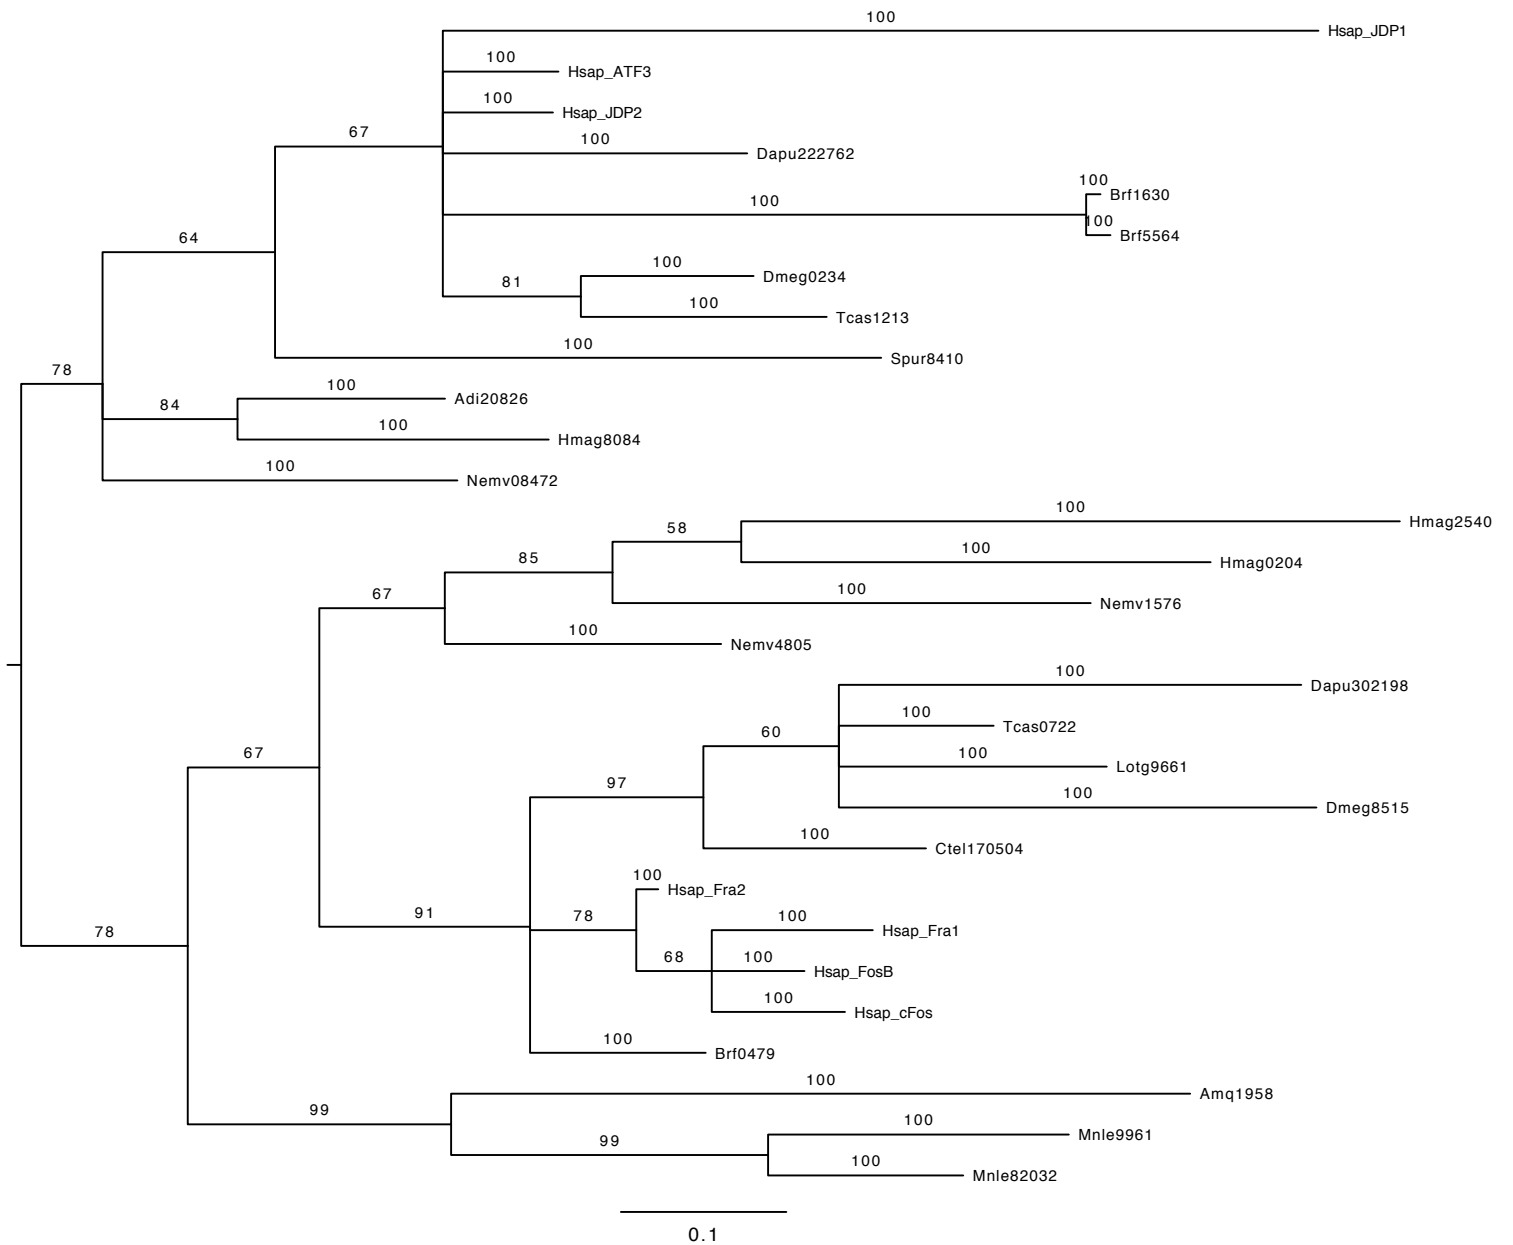

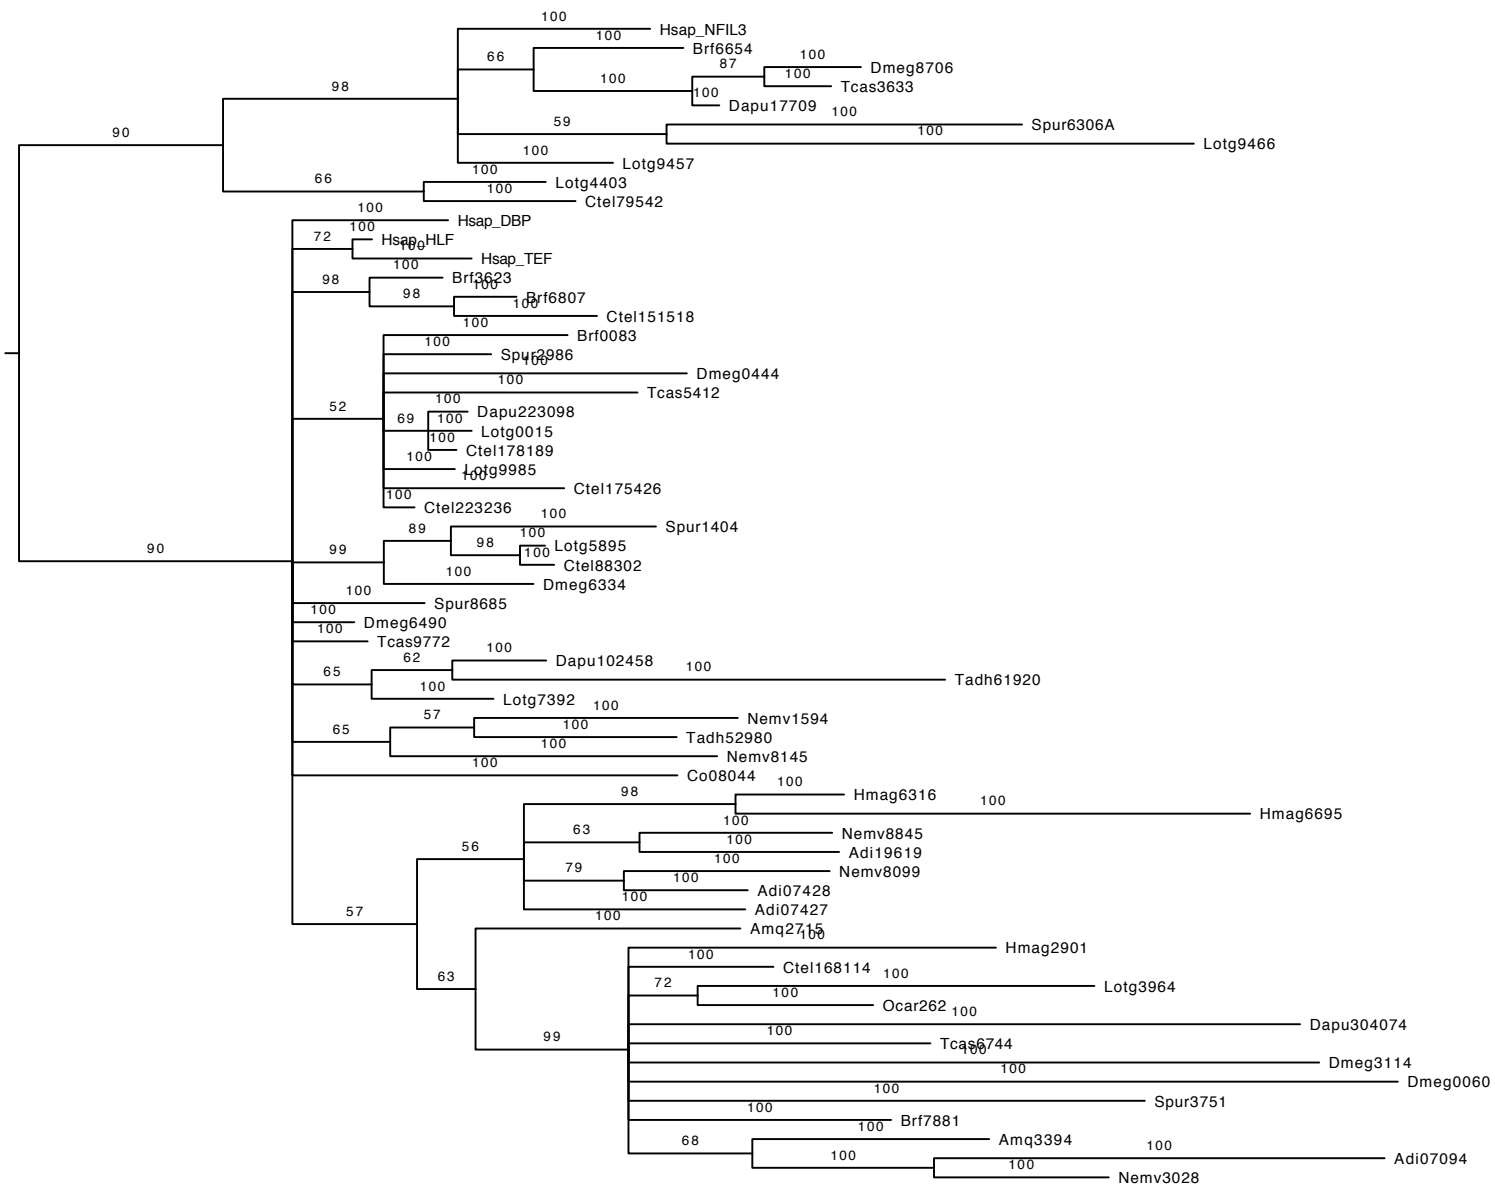

0.2

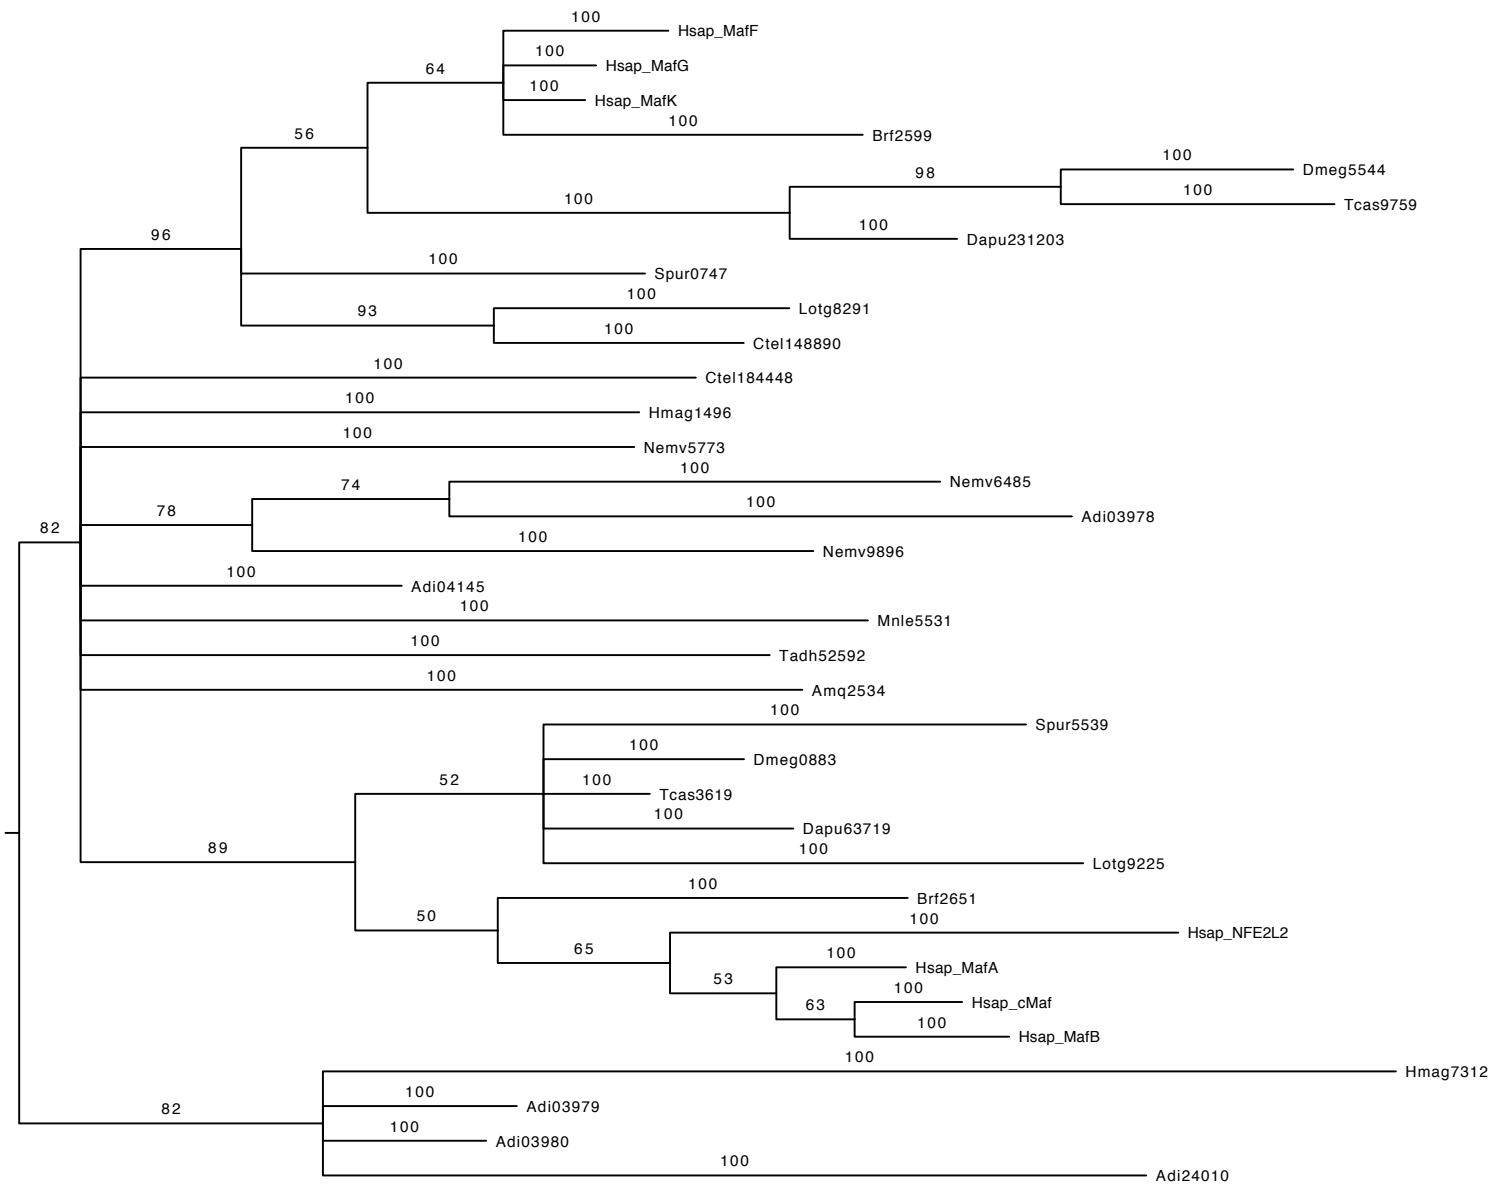

Supplement: 12862_2016_598_MOESM3_ESM.pdf [file 12862_2016_598_MOESM3_ESM.pdf]
